# Supplementary material
Source: HighWire-hosted journal article supplement (https://cmaj.ca/content/suppl/2010/05/17/cmaj.091881)
Supplement: nurse-ing-appendix_2.pdf [file nurse-ing-appendix_2.pdf]

## Appendix 2 (as supplied by the authors): Extracts from the questionnaire used for the study

This appendix presents a considerable part of the questionnaire in which we present the questions relevant for the role of nurses in the administration of life-ending drugs with the explicit intention to end the patient's life.

### The involvement of nurses in end-of-life decisions

#### Introduction

As explained in the first questionnaire, end-of-life decisions are understood to mean the following three decisions:

**Table 1. Three end-of-life decisions with a possible or certain life-shortening effect**

|                    |                                                                                                                  |
|--------------------|------------------------------------------------------------------------------------------------------------------|
| <b>Decision 1:</b> | Withholding or withdrawing a potential life-prolonging treatment (including artificial food and/or fluid)        |
| <b>Decision 2:</b> | The intensification of the medication for pain and/or symptom alleviation with a possible life-shortening effect |
| <b>Decision 3:</b> | The administering of life-ending drugs with the explicit intention of ending the patient's life                  |

We ask you to recall the most recent patient you cared for whose treatment involved at least one of the three end-of-life decisions presented in table 1. In keeping this patient in mind, we ask you to answer all the following questions about this patient.

#### Information about this patient

|                                                                                    |                                                                                                                                  |                                                                                                                                                                                                                                                                                                                                                                                                                                                                                                                                |
|------------------------------------------------------------------------------------|----------------------------------------------------------------------------------------------------------------------------------|--------------------------------------------------------------------------------------------------------------------------------------------------------------------------------------------------------------------------------------------------------------------------------------------------------------------------------------------------------------------------------------------------------------------------------------------------------------------------------------------------------------------------------|
| 1                                                                                  | What is this patient's gender?                                                                                                   | <input type="checkbox"/> Male<br><input type="checkbox"/> Female                                                                                                                                                                                                                                                                                                                                                                                                                                                               |
| 2                                                                                  | What was the age of this patient at the time of death?                                                                           | _____ years                                                                                                                                                                                                                                                                                                                                                                                                                                                                                                                    |
| 3                                                                                  | What was the main diagnosis (max. one) of cause of death of this patient?                                                        | <input type="checkbox"/> Cancer: _____<br><input type="checkbox"/> Cardiovascular disease: _____<br><input type="checkbox"/> Respiratory disease: _____<br><input type="checkbox"/> Nervous system disease: _____<br><input type="checkbox"/> Dementia<br><input type="checkbox"/> Old age / Complete deterioration<br><input type="checkbox"/> Other: _____                                                                                                                                                                   |
| 4                                                                                  | Did this patient, during the last month before death, suffer from other disorders, illnesses or disabilities?                    | <input type="checkbox"/> Yes: _____<br><input type="checkbox"/> No<br><input type="checkbox"/> Don't know                                                                                                                                                                                                                                                                                                                                                                                                                      |
| 5                                                                                  | What was the place of death of this patient?                                                                                     | <input type="checkbox"/> At home or living with family<br><input type="checkbox"/> Care home: home for elderly or nursing home<br><input type="checkbox"/> Hospital (exc. Palliative care unit or nursing home unit in hospital)<br><input type="checkbox"/> Palliative care unit (hospital)<br><input type="checkbox"/> Somewhere else: _____                                                                                                                                                                                 |
| 6                                                                                  | Did this patient, during the last month before death, stay somewhere other than at the place of death?                           | <input type="checkbox"/> Yes: _____<br><input type="checkbox"/> No<br><input type="checkbox"/> Don't know                                                                                                                                                                                                                                                                                                                                                                                                                      |
| 7                                                                                  | Which specialist palliative care initiatives were brought into action for this patient?<br>- More than one answer can be given - | <input type="checkbox"/> None → go to question 8<br><input type="checkbox"/> Palliative home care team<br><input type="checkbox"/> Mobile palliative support team in a care home<br><input type="checkbox"/> Mobile palliative support team in a hospital<br><input type="checkbox"/> Palliative care unit (hospital)<br><input type="checkbox"/> Reference persons for palliative care in a care home<br><input type="checkbox"/> Reference persons for palliative care in home care<br><input type="checkbox"/> Other: _____ |
| Are you working in one of the above marked specialist palliative care initiatives? |                                                                                                                                  | <input type="checkbox"/> Yes<br><input type="checkbox"/> No                                                                                                                                                                                                                                                                                                                                                                                                                                                                    |

**End-of-life decisions taken with this patient**

In the table (on page 1) we presented three possible life-shortening end-of-life decisions. In the following three questions we ask you whether the decision was taken for this patient.

- 8 Were potential life-prolonging treatments withheld or withdrawn (including artificial food or fluid) for this patient?  Yes  No
- 9 Was the medication for pain and/or symptom management intensified with a possible life-shortening effect for this patient?  Yes  No
- 10 Was the death of this patient the result of the administering of life-ending drugs with the explicit intention to end the patient's life?  Yes → go to the following question (10.1)  No → go to question 11

**Please answer the following questions based on this last decision (question 10)**

- 10.1 Was this decision taken at the explicit request of the patient?  Yes  No
- 10.2 Were you present during the administering of the drugs preceding the death of the patient?  Yes  No → go to question 10.4
- 10.3 Which persons did you support during this administering? *– More than one answer can be given –*
- Nobody  Physician  
 Patient  Colleague-nurse(s)  
 Relatives  Other: \_\_\_\_\_

**10.4 As far as you know, what drugs were administered to the patient preceding the death of the patient?**

**INSTRUCTION:**

- If you marked the drugs in column **a**, go on to column **b**.

- If you marked 'You yourself' in column **b**, go on to column **c** and **d**.

**FILL THIS PART IN IF YOU MARKED 'YOU YOURSELF' IN COLUMN b:**

|                           | a – What drugs were given? | b – Who administered the drugs?<br><i>– More than one answer can be given –</i> |                          |                          |                          |                          |                          | c – Did you administered the drugs on the physician's orders? |                          | d – Was the physician present while you administered the drugs? |                           |                          |
|---------------------------|----------------------------|---------------------------------------------------------------------------------|--------------------------|--------------------------|--------------------------|--------------------------|--------------------------|---------------------------------------------------------------|--------------------------|-----------------------------------------------------------------|---------------------------|--------------------------|
|                           |                            | Physician                                                                       | You yourself             | Other nurse              | Patient                  | Other                    | Don't know               | Yes                                                           | No                       | Yes, continuously                                               | Yes, but not continuously | No                       |
| Morphine or other opioids | <input type="checkbox"/>   | <input type="checkbox"/>                                                        | <input type="checkbox"/> | <input type="checkbox"/> | <input type="checkbox"/> | <input type="checkbox"/> | <input type="checkbox"/> | <input type="checkbox"/>                                      | <input type="checkbox"/> | <input type="checkbox"/>                                        | <input type="checkbox"/>  | <input type="checkbox"/> |
| Benzodiazepines           | <input type="checkbox"/>   | <input type="checkbox"/>                                                        | <input type="checkbox"/> | <input type="checkbox"/> | <input type="checkbox"/> | <input type="checkbox"/> | <input type="checkbox"/> | <input type="checkbox"/>                                      | <input type="checkbox"/> | <input type="checkbox"/>                                        | <input type="checkbox"/>  | <input type="checkbox"/> |
| Barbiturates              | <input type="checkbox"/>   | <input type="checkbox"/>                                                        | <input type="checkbox"/> | <input type="checkbox"/> | <input type="checkbox"/> | <input type="checkbox"/> | <input type="checkbox"/> | <input type="checkbox"/>                                      | <input type="checkbox"/> | <input type="checkbox"/>                                        | <input type="checkbox"/>  | <input type="checkbox"/> |
| Neuromuscular relaxants   | <input type="checkbox"/>   | <input type="checkbox"/>                                                        | <input type="checkbox"/> | <input type="checkbox"/> | <input type="checkbox"/> | <input type="checkbox"/> | <input type="checkbox"/> | <input type="checkbox"/>                                      | <input type="checkbox"/> | <input type="checkbox"/>                                        | <input type="checkbox"/>  | <input type="checkbox"/> |
| Other: _____              | <input type="checkbox"/>   | <input type="checkbox"/>                                                        | <input type="checkbox"/> | <input type="checkbox"/> | <input type="checkbox"/> | <input type="checkbox"/> | <input type="checkbox"/> | <input type="checkbox"/>                                      | <input type="checkbox"/> | <input type="checkbox"/>                                        | <input type="checkbox"/>  | <input type="checkbox"/> |
| Don't know                | <input type="checkbox"/>   |                                                                                 |                          |                          |                          |                          |                          |                                                               |                          |                                                                 |                           |                          |

- 10.5 Which one of following preparatory tasks preceding the administering of the drugs did you take on? *– More than one answer can be given –*
- Preparing the surroundings/room of the patient  
 Receiving the drugs from the pharmacist  
 Preparation and control of the drugs  
 Setting out the drugs/equipment for the physician  
 Passing the drugs/equipment to the physician  
 Other: \_\_\_\_\_  
 None of the above

10.6 Was there communication (either written or oral) between you and the physician about this decision?

- Yes, once
- Yes, more than once
- No → go to question 10.7

Mark which of the following were applicable:

- |   |                                                                                                                 |                          |
|---|-----------------------------------------------------------------------------------------------------------------|--------------------------|
| 1 | Physician communicated the decision after this decision was made                                                | <input type="checkbox"/> |
| 2 | Physician informed me of the wishes of the patient and/or relatives about this decision                         | <input type="checkbox"/> |
| 3 | Physician asked me, before making this decision, for information about:                                         |                          |
|   | - the patient's condition                                                                                       | <input type="checkbox"/> |
|   | - the wishes of the patient and/or relatives                                                                    | <input type="checkbox"/> |
| 4 | Physician asked me, before making this decision, for my personal opinion about it                               | <input type="checkbox"/> |
| 5 | Physician made the decision in consultation with me                                                             | <input type="checkbox"/> |
| 6 | I informed the physician about the wishes of the patient and/or relatives                                       | <input type="checkbox"/> |
| 7 | I informed the physician about the patient's condition, before this decision was made                           | <input type="checkbox"/> |
| 8 | I gave the physician my personal opinion about this decision                                                    | <input type="checkbox"/> |
| 9 | I advocated for the wishes of the patient and/or relatives about this decision in discussion with the physician | <input type="checkbox"/> |

10.7 Was there communication between you and the patient and/or relatives about this decision?

- More than one answer can be given -

- Yes, with the patient → mark the column under patient
- Yes, with the relatives → mark the column under relatives
- No

Mark which of the following were applicable:

- |                                                                            |                                                                                               | patient                  | relatives                |
|----------------------------------------------------------------------------|-----------------------------------------------------------------------------------------------|--------------------------|--------------------------|
| 1                                                                          | The patient/relatives - what their wishes were about this decision                            | <input type="checkbox"/> | <input type="checkbox"/> |
|                                                                            | communicated to me: - what their wishes were about this decision before telling the physician | <input type="checkbox"/> | <input type="checkbox"/> |
| <i>Additional questions were asked, but were not covered in the paper.</i> |                                                                                               |                          |                          |

...
